# Supplementary material for: Characterization of GH2 and GH42 β-galactosidases derived from bifidobacterial infant isolates
Source: PubMed Central journal article supplement (PMC6339635; doi:10.1186/s13568-019-0735-3), 2019-01-19
Supplement: 13568_2019_735_MOESM1_ESM.pdf [file 13568_2019_735_MOESM1_ESM.pdf]

## **SUPPLEMENTARY MATERIAL**

**Journal name: AMB Express**

**Title: Characterization of GH2 and GH42  $\beta$ -galactosidases derived from bifidobacterial infant isolates.**

**Valentina Ambrogi<sup>1,2</sup>, Francesca Bottacini<sup>1</sup>, Joyce O'Sullivan<sup>1</sup>, Mary O'Connell Motherway<sup>1</sup>, Cao Linqiu<sup>3</sup>, Barry Schoemaker<sup>3</sup>, Margriet Schoterman<sup>3</sup> and Douwe van Sinderen<sup>1,2\*</sup>.**

<sup>1</sup>APC Microbiome Ireland, University College Cork, Western Road, Cork, Ireland

<sup>2</sup>School of Microbiology, National University of Ireland, Western Road, Cork, Ireland

<sup>3</sup>FrieslandCampina, Amersfoort, the Netherlands

\* Corresponding author.

Corresponding author email address: [d.vansinderen@ucc.ie](mailto:d.vansinderen@ucc.ie)

**Running title:** Bifidobacterial  $\beta$ -galactosidases

**Table S1.** List of bifidobacterial genes used for comparative purposes.

| ClusterID | Locus_tag           | Species           | Strain      | Gene size (aa) | Accession | GH family | Reference           |
|-----------|---------------------|-------------------|-------------|----------------|-----------|-----------|---------------------|
| Cluster1  | BbgIII              | <i>B. bifidum</i> | JCM 1254    | 1935           | BAI94821  | GH2       | Miwa et al. 2010    |
| Cluster1  | BIF3                | <i>B. bifidum</i> | DSM 20215   | 1752           | CAC14566  | GH2       | Moller et al. 2001  |
| Cluster1  | BBBF_0474           | <i>B. bifidum</i> | DSM 20456   | 1935           | BAQ97681  | GH2       |                     |
| Cluster1  | B216_06500          | <i>B. bifidum</i> | LMG 13195   | 1803           | EKE50382  | GH2       |                     |
| Cluster1  | BBB_0459            | <i>B. bifidum</i> | BGN4        | 1935           | AFL04054  | GH2       |                     |
| Cluster1  | BBNG_00396 (BbgIII) | <i>B. bifidum</i> | NCIMB 41171 | 1891           | EFR49849  | GH2       | Goulas et al. 2007  |
| Cluster1  | BBPR_0482           | <i>B. bifidum</i> | PRL2010     | 1935           | ADP35589  | GH2       | Turroni et al. 2010 |
| Cluster1  | BBIF_0507           | <i>B. bifidum</i> | S17         | 1935           | ADO52712  | GH2       |                     |
| Cluster2  | BbgI                | <i>B. bifidum</i> | JCM 1254    | 1291           | BAI94825  | GH2       | Miwa et al. 2010    |
| Cluster2  | BBBF_0159           | <i>B. bifidum</i> | DSM 20456   | 1292           | BAQ97366  | GH2       |                     |
| Cluster2  | BBB_0145            | <i>B. bifidum</i> | BGN4        | 1291           | AFL03741  | GH2       |                     |
| Cluster2  | B217_01231          | <i>B. bifidum</i> | IPLA20015   | 1292           | EKF16574  | GH2       |                     |
| Cluster2  | BIFI_0651           | <i>B. bifidum</i> | LMG 11041   | 1292           | KFI42266  | GH2       |                     |
| Cluster2  | BBNG_00071 (BbgI)   | <i>B. bifidum</i> | NCIMB 41171 | 1291           | EFR49525  | GH2       | Goulas et al. 2007  |
| Cluster2  | B216_09411          | <i>B. bifidum</i> | LMG 13195   | 1292           | EKE49818  | GH2       |                     |
| Cluster2  | BBPR_0150           | <i>B. bifidum</i> | PRL2010     | 1292           | ADP35284  | GH2       | Turroni et al. 2010 |
| Cluster2  | BBIF_0188           | <i>B. bifidum</i> | S17         | 1292           | ADO52393  | GH2       |                     |
| Cluster3  | BbgIV               | <i>B. bifidum</i> | JCM 1254    | 1052           | BAI94821  | GH2       | Miwa et al. 2010    |
| Cluster3  | BBBF_1456           | <i>B. bifidum</i> | DSM 20456   | 1052           | BAQ98663  | GH2       |                     |
| Cluster3  | BBB_1439            | <i>B. bifidum</i> | BGN4        | 1052           | AFL05030  | GH2       |                     |
| Cluster3  | B217_02490          | <i>B. bifidum</i> | IPLA20015   | 1052           | EKF16333  | GH2       |                     |
| Cluster3  | BIFI_0119           | <i>B. bifidum</i> | LMG 11041   | 1052           | KFI43782  | GH2       |                     |
| Cluster3  | B216_09623          | <i>B. bifidum</i> | LMG 13195   | 1052           | EKE49770  | GH2       |                     |
| Cluster3  | BBNG_01638 (BbgIV)  | <i>B. bifidum</i> | NCIMB 41171 | 1052           | EFR51090  | GH2       | Goulas et al. 2007  |
| Cluster3  | BBPR_1460           | <i>B. bifidum</i> | PRL2010     | 1052           | ADP36493  | GH2       | Turroni et al. 2010 |

|                  |                    |                   |             |          |             |      |                                     |
|------------------|--------------------|-------------------|-------------|----------|-------------|------|-------------------------------------|
| <b>Cluster3</b>  | BBIF_1406          | <i>B. bifidum</i> | S17         | 1053     | ADO53611    | GH2  |                                     |
| <b>Cluster6</b>  | BIF2               | <i>B. bifidum</i> | DSM 20215   | 1044     | CAC14565    | GH2  | Moller et al. 2001                  |
| <b>Cluster9</b>  | BIF1               | <i>B. bifidum</i> | DSM 20215   | 1020     | CAB75342    | GH2  | Moller et al. 2001                  |
| <b>Cluster10</b> | B217_07459         | <i>B. bifidum</i> | IPLA20015   | 987      | EKF15369    | GH2  |                                     |
| <b>Cluster12</b> | BbgV               | <i>B. bifidum</i> | JCM 1254    | 740      | BAI94828    | GH42 | Miwa et al. 2010                    |
| <b>Cluster12</b> | BBBF_0172          | <i>B. bifidum</i> | DSM 20456   | 739      | BAQ97379    | GH42 |                                     |
| <b>Cluster12</b> | BBB_0160           | <i>B. bifidum</i> | BGN4        | 726      | AFL03756    | GH42 |                                     |
| <b>Cluster12</b> | BIFI_0664          | <i>B. bifidum</i> | LMG 11041   | 726      | KFI42279    | GH42 |                                     |
| <b>Cluster12</b> | B216_08730         | <i>B. bifidum</i> | LMG 13195   | 714      | EKE49942    | GH42 |                                     |
| <b>Cluster12</b> | BBNG_00089         | <i>B. bifidum</i> | NCIMB 41171 | 726      | EFR49543    | GH42 |                                     |
| <b>Cluster12</b> | BBPR_0164          | <i>B. bifidum</i> | PRL2010     | 726      | ADP35297    | GH42 |                                     |
| <b>Cluster15</b> | BbgII              | <i>B. bifidum</i> | JCM 1254    | 689      | BAI94826    | GH42 | Miwa et al. 2010                    |
| <b>Cluster15</b> | BBBF_1344          | <i>B. bifidum</i> | DSM 20456   | 693      | BAQ98551    | GH42 |                                     |
| <b>Cluster15</b> | BBB_1337           | <i>B. bifidum</i> | BGN4        | 689      | AFL04929    | GH42 |                                     |
| <b>Cluster15</b> | BBPR_1355          | <i>B. bifidum</i> | PRL2010     | 690      | ADP36405    | GH42 | Turroni et al. 2010                 |
| <b>Cluster15</b> | BIFI_0010          | <i>B. bifidum</i> | LMG 11041   | 689      | KFI43682    | GH42 |                                     |
| <b>Cluster15</b> | B216_08266         | <i>B. bifidum</i> | LMG 13195   | 693      | EKE50024    | GH42 |                                     |
| <b>Cluster15</b> | BBNG_01731 (BbgII) | <i>B. bifidum</i> | NCIMB 41171 | 689      | EFR51183    | GH42 | Goulas et al. 2007                  |
| <b>Cluster15</b> | BBIF_1313          | <i>B. bifidum</i> | S17         | 689      | ADO53518    | GH42 |                                     |
| <b>Cluster16</b> | B217_02337         | <i>B. bifidum</i> | IPLA20015   | 609      | EKF16372    | GH42 |                                     |
| <b>Cluster3</b>  | B2L_0246           | <i>B. breve</i>   | 2L          | 1163     | EWB42012    | GH2  |                                     |
| <b>Cluster3</b>  | B7019_1720         | <i>B. breve</i>   | JCM 7019    | 1052     | AHJ19889    | GH2  |                                     |
| <b>Cluster4</b>  | Bbr_1689-90        | <i>B. breve</i>   | UCC2003     | 157+1054 | ABE96355-56 | GH2  |                                     |
| <b>Cluster4</b>  | B31L_1766-67       | <i>B. breve</i>   | 31L         | 157+1054 | EWB39417-18 | GH2  |                                     |
| <b>Cluster4</b>  | B2258_1707-08      | <i>B. breve</i>   | NCFB 2258   | 157+1054 | AHJ21881-82 | GH2  |                                     |
| <b>Cluster4</b>  | BS27_1679-80       | <i>B. breve</i>   | S27         | 157+1054 | AHJ25446-47 | GH2  |                                     |
| <b>Cluster5</b>  | Bbr_0010           | <i>B. breve</i>   | UCC2003     | 1043     | ABE94727    | GH2  | Ruiz et al. 2013; James et al. 2016 |
| <b>Cluster5</b>  | B2L_0837           | <i>B. breve</i>   | 2L          | 1043     | EWB42557    | GH2  |                                     |
| <b>Cluster5</b>  | B12L_0010          | <i>B. breve</i>   | 12L         | 1043     | AHJ14821    | GH2  |                                     |

|                  |                  |                 |           |      |          |      |
|------------------|------------------|-----------------|-----------|------|----------|------|
| <b>Cluster5</b>  | B31L_0439        | <i>B. breve</i> | 31L       | 1043 | EWH41715 | GH2  |
| <b>Cluster5</b>  | B7017_0010       | <i>B. breve</i> | JCM 7017  | 1043 | AHJ16586 | GH2  |
| <b>Cluster5</b>  | B7019_0010       | <i>B. breve</i> | JCM 7019  | 1043 | AHJ18356 | GH2  |
| <b>Cluster5</b>  | HMPREF1587_01718 | <i>B. breve</i> | JCP 7499  | 1051 | ERI86567 | GH2  |
| <b>Cluster5</b>  | B2258_0010       | <i>B. breve</i> | NCFB 2258 | 1043 | AHJ20271 | GH2  |
| <b>Cluster5</b>  | BS27_0010        | <i>B. breve</i> | S27       | 1043 | AHJ23926 | GH2  |
| <b>Cluster6</b>  | Bbr_1552         | <i>B. breve</i> | UCC2003   | 1045 | ABE96223 | GH2  |
| <b>Cluster6</b>  | B12L_1479        | <i>B. breve</i> | 12L       | 1045 | AHJ16208 | GH2  |
| <b>Cluster6</b>  | B31L_1616        | <i>B. breve</i> | 31L       | 1045 | EWH39283 | GH2  |
| <b>Cluster6</b>  | B7017_1745       | <i>B. breve</i> | JCM 7017  | 1045 | AHJ17983 | GH2  |
| <b>Cluster6</b>  | HMPREF1587_01118 | <i>B. breve</i> | JCP 7499  | 1045 | ERI87315 | GH2  |
| <b>Cluster6</b>  | B2258_1567       | <i>B. breve</i> | NCFB 2258 | 1045 | AHJ21745 | GH2  |
| <b>Cluster6</b>  | BS27_1534        | <i>B. breve</i> | S27       | 1044 | AHJ25307 | GH2  |
| <b>Cluster13</b> | B2L_1156         | <i>B. breve</i> | 2L        | 710  | EWH41313 | GH42 |
| <b>Cluster13</b> | B12L_0358        | <i>B. breve</i> | 12L       | 710  | AHJ15148 | GH42 |
| <b>Cluster13</b> | B31L_0023        | <i>B. breve</i> | 31L       | 710  | EWH41352 | GH42 |
| <b>Cluster13</b> | B7017_0374       | <i>B. breve</i> | JCM 7017  | 710  | AHJ16917 | GH42 |
| <b>Cluster13</b> | B7019_0383       | <i>B. breve</i> | JCM 7019  | 710  | AHJ18699 | GH42 |
| <b>Cluster13</b> | HMPREF1587_00395 | <i>B. breve</i> | JCP 7499  | 710  | ERI87956 | GH42 |
| <b>Cluster13</b> | B2258_0392       | <i>B. breve</i> | NCFB 2258 | 710  | AHJ20623 | GH42 |
| <b>Cluster13</b> | Bbr_0420         | <i>B. breve</i> | UCC2003   | 710  | ABE95118 | GH42 |
| <b>Cluster13</b> | BS27_0422        | <i>B. breve</i> | S27       | 710  | AHJ24299 | GH42 |
| <b>Cluster14</b> | B7017_2031       | <i>B. breve</i> | JCM 7017  | 701  | AHJ18248 | GH42 |
| <b>Cluster15</b> | B2L_1017         | <i>B. breve</i> | 2L        | 691  | EWH41185 | GH42 |
| <b>Cluster15</b> | B12L_0447        | <i>B. breve</i> | 12L       | 691  | AHJ15235 | GH42 |
| <b>Cluster15</b> | B31L_1298        | <i>B. breve</i> | 31L       | 691  | EWH41023 | GH42 |
| <b>Cluster15</b> | B7017_0482       | <i>B. breve</i> | JCM 7017  | 691  | AHJ17019 | GH42 |

O' Connell Motherway et al. 2012; James et al. 2016

O' Connell Motherway et al. 2012

|                  |                  |                                       |            |      |          |      |
|------------------|------------------|---------------------------------------|------------|------|----------|------|
| <b>Cluster15</b> | B7019_0489       | <i>B. breve</i>                       | JCM 7019   | 690  | AHJ18798 | GH42 |
| <b>Cluster15</b> | HMPREF1587_00540 | <i>B. breve</i>                       | JCP 7499   | 691  | ERI87893 | GH42 |
| <b>Cluster15</b> | B2258_0481       | <i>B. breve</i>                       | NCFB 2258  | 691  | AHJ20707 | GH42 |
| <b>Cluster15</b> | BS27_0520        | <i>B. breve</i>                       | S27        | 690  | AHJ24385 | GH42 |
| <b>Cluster15</b> | Bbr_0529         | <i>B. breve</i>                       | UCC2003    | 691  | ABE95226 | GH42 |
| <b>Cluster17</b> | Bbr_0285         | <i>B. breve</i>                       | UCC2003    | 606  | ABE94991 | GH2  |
| <b>Cluster18</b> | B7019_0853       | <i>B. breve</i>                       | JCM 7019   | 586  | AHJ19136 | GH2  |
| <b>Cluster18</b> | Bbr_0310         | <i>B. breve</i>                       | UCC2003    | 586  | ABE95012 | GH2  |
| <b>Cluster7</b>  | B8809_0611       | <i>B. longum</i> subsp. <i>longum</i> | NCIMB 8809 | 1023 | ALO72284 | GH2  |
| <b>Cluster7</b>  | EK13BL_04235     | <i>B. longum</i> subsp. <i>longum</i> | EK13       | 1023 | KEY32734 | GH2  |
| <b>Cluster7</b>  | BIL_12070        | <i>B. longum</i> subsp. <i>longum</i> | F8         | 1023 | CBK70710 | GH2  |
| <b>Cluster7</b>  | BLJ_0749         | <i>B. longum</i> subsp. <i>longum</i> | JDM301     | 1023 | ADH00219 | GH2  |
| <b>Cluster7</b>  | BLNIAS_01829     | <i>B. longum</i> subsp. <i>longum</i> | KACC 91563 | 1023 | AEI97790 | GH2  |
| <b>Cluster7</b>  | NL89_01385       | <i>B. longum</i> subsp. <i>longum</i> | VMKB44     | 1023 | KHD96107 | GH2  |
| <b>Cluster8</b>  | B8809_1361       | <i>B. longum</i> subsp. <i>longum</i> | NCIMB 8809 | 1063 | ALO73032 | GH2  |
| <b>Cluster8</b>  | HMPREF0175_1109  | <i>B. longum</i> subsp. <i>longum</i> | ATCC 55813 | 1064 | EEI80881 | GH2  |
| <b>Cluster8</b>  | BBMN68_1812      | <i>B. longum</i> subsp. <i>longum</i> | BBMN68     | 1063 | ADQ02870 | GH2  |
| <b>Cluster8</b>  | BLLJ_1486        | <i>B. longum</i> subsp. <i>longum</i> | JCM 1217   | 1063 | BAJ67153 | GH2  |
| <b>Cluster8</b>  | BLSL_1472        | <i>B. longum</i> subsp. <i>longum</i> | LMG 13197  | 1063 | KFI62448 | GH2  |
| <b>Cluster11</b> | BLJ_1934         | <i>B. longum</i> subsp. <i>longum</i> | JDM301     | 788  | ADH01357 | GH42 |
| <b>Cluster13</b> | HMPREF0175_0277  | <i>B. longum</i> subsp. <i>longum</i> | ATCC 55813 | 719  | EEI81809 | GH42 |
| <b>Cluster13</b> | BLLJ_0352        | <i>B. longum</i> subsp. <i>longum</i> | JCM 1217   | 719  | BAJ66022 | GH42 |
| <b>Cluster13</b> | NL89_05225       | <i>B. longum</i> subsp. <i>longum</i> | VMKB44     | 719  | KHD95104 | GH42 |
| <b>Cluster13</b> | B8809_0321       | <i>B. longum</i> subsp. <i>longum</i> | NCIMB 8809 | 710  | ALO71994 | GH42 |
| <b>Cluster13</b> | BN57_524         | <i>B. longum</i> subsp. <i>longum</i> | CECT 7347  | 710  | CCK34389 | GH42 |
| <b>Cluster13</b> | BBMN68_1021      | <i>B. longum</i> subsp. <i>longum</i> | BBMN68     | 710  | ADQ01982 | GH42 |
| <b>Cluster13</b> | EK13BL_10545     | <i>B. longum</i> subsp. <i>longum</i> | EK13       | 710  | KEY33117 | GH42 |
| <b>Cluster13</b> | BIL_15140        | <i>B. longum</i> subsp. <i>longum</i> | F8         | 710  | CBK70970 | GH42 |

O' Connell Motherway et al. 2012; James et al 2016

|                  |                 |                                         |            |          |             |      |                                      |
|------------------|-----------------|-----------------------------------------|------------|----------|-------------|------|--------------------------------------|
| <b>Cluster13</b> | BLJ_0417        | <i>B. longum</i> subsp. <i>longum</i>   | JDM301     | 710      | ADG99893    | GH42 |                                      |
| <b>Cluster13</b> | BLNIAS_02287    | <i>B. longum</i> subsp. <i>longum</i>   | KACC 91563 | 710      | AEI98104    | GH42 |                                      |
| <b>Cluster13</b> | BLSL_0343       | <i>B. longum</i> subsp. <i>longum</i>   | LMG 13197  | 675      | KFI64946    | GH42 |                                      |
| <b>Cluster15</b> | B8809_0415      | <i>B. longum</i> subsp. <i>longum</i>   | NCIMB 8809 | 691      | ALO72088    | GH42 |                                      |
| <b>Cluster15</b> | HMPREF0175_0769 | <i>B. longum</i> subsp. <i>longum</i>   | ATCC 55813 | 691      | EEI81198    | GH42 |                                      |
| <b>Cluster15</b> | BN57_621        | <i>B. longum</i> subsp. <i>longum</i>   | CECT 7347  | 691      | CCK34482    | GH42 |                                      |
| <b>Cluster15</b> | BBMN68_930      | <i>B. longum</i> subsp. <i>longum</i>   | BBMN68     | 691      | ADQ01884    | GH42 |                                      |
| <b>Cluster15</b> | EK13BL_02710    | <i>B. longum</i> subsp. <i>longum</i>   | EK13       | 691      | KEY32452    | GH42 |                                      |
| <b>Cluster15</b> | BIL_14030       | <i>B. longum</i> subsp. <i>longum</i>   | F8         | 691      | CBK70878    | GH42 |                                      |
| <b>Cluster15</b> | BLLJ_0443       | <i>B. longum</i> subsp. <i>longum</i>   | JCM 1217   | 691      | BAJ66112    | GH42 |                                      |
| <b>Cluster15</b> | BLJ_0519        | <i>B. longum</i> subsp. <i>longum</i>   | JDM301     | 691      | ADG99995    | GH42 |                                      |
| <b>Cluster15</b> | BLSL_0435       | <i>B. longum</i> subsp. <i>longum</i>   | LMG 13197  | 691      | KFI65038    | GH42 |                                      |
| <b>Cluster15</b> | NL89_00375      | <i>B. longum</i> subsp. <i>longum</i>   | VMKB44     | 691      | KHD95934    | GH42 |                                      |
| <b>Cluster4</b>  | BLIF_0281-82    | <i>B. longum</i> subsp. <i>infantis</i> | 157F       | 157+1054 | BAJ70428-29 | GH2  |                                      |
| <b>Cluster7</b>  | Blon_2334       | <i>B. longum</i> subsp. <i>infantis</i> | ATCC 15697 | 1023     | ACJ53392    | GH2  | Garrido et al. 2013; Sela et al 2008 |
| <b>Cluster7</b>  | EK3BL_00585     | <i>B. longum</i> subsp. <i>infantis</i> | EK3        | 1023     | KEY30718    | GH2  |                                      |
| <b>Cluster7</b>  | BLIG_00914      | <i>B. longum</i> subsp. <i>infantis</i> | CCUG 52486 | 1023     | EEQ54963    | GH2  |                                      |
| <b>Cluster7</b>  | BLIF_0659       | <i>B. longum</i> subsp. <i>infantis</i> | 157F       | 1023     | BAJ70802    | GH2  |                                      |
| <b>Cluster12</b> | Blon_2123       | <i>B. longum</i> subsp. <i>infantis</i> | ATCC 15697 | 720      | ACJ53184    | GH42 | Garrido et al. 2013                  |
| <b>Cluster12</b> | EK3BL_09165     | <i>B. longum</i> subsp. <i>infantis</i> | EK3        | 720      | KEY26226    | GH42 |                                      |
| <b>Cluster13</b> | BLIF_0351       | <i>B. longum</i> subsp. <i>infantis</i> | 157F       | 710      | BAJ70496    | GH42 |                                      |
| <b>Cluster13</b> | BLIG_00257      | <i>B. longum</i> subsp. <i>infantis</i> | CCUG 52486 | 710      | EEQ54308    | GH42 |                                      |
| <b>Cluster14</b> | Blon_2416       | <i>B. longum</i> subsp. <i>infantis</i> | ATCC 15697 | 706      | ACJ53470    | GH42 | Garrido et al. 2013                  |
| <b>Cluster15</b> | Blon_2016       | <i>B. longum</i> subsp. <i>infantis</i> | ATCC 15697 | 691      | ACJ53083    | GH42 | Garrido et al. 2013; Sela et al 2008 |
| <b>Cluster15</b> | BLIF_0460       | <i>B. longum</i> subsp. <i>infantis</i> | 157F       | 691      | BAJ70604    | GH42 |                                      |
| <b>Cluster15</b> | BLIG_00161      | <i>B. longum</i> subsp. <i>infantis</i> | CCUG 52486 | 691      | EEQ54212    | GH42 |                                      |
| <b>Cluster15</b> | EK3BL_06145     | <i>B. longum</i> subsp. <i>infantis</i> | EK3        | 691      | KEY27369    | GH42 |                                      |
| <b>Cluster17</b> | Blon_0268       | <i>B. longum</i> subsp. <i>infantis</i> | ATCC 15697 | 606      | ACJ51396    | GH42 | Garrido et al. 2013                  |

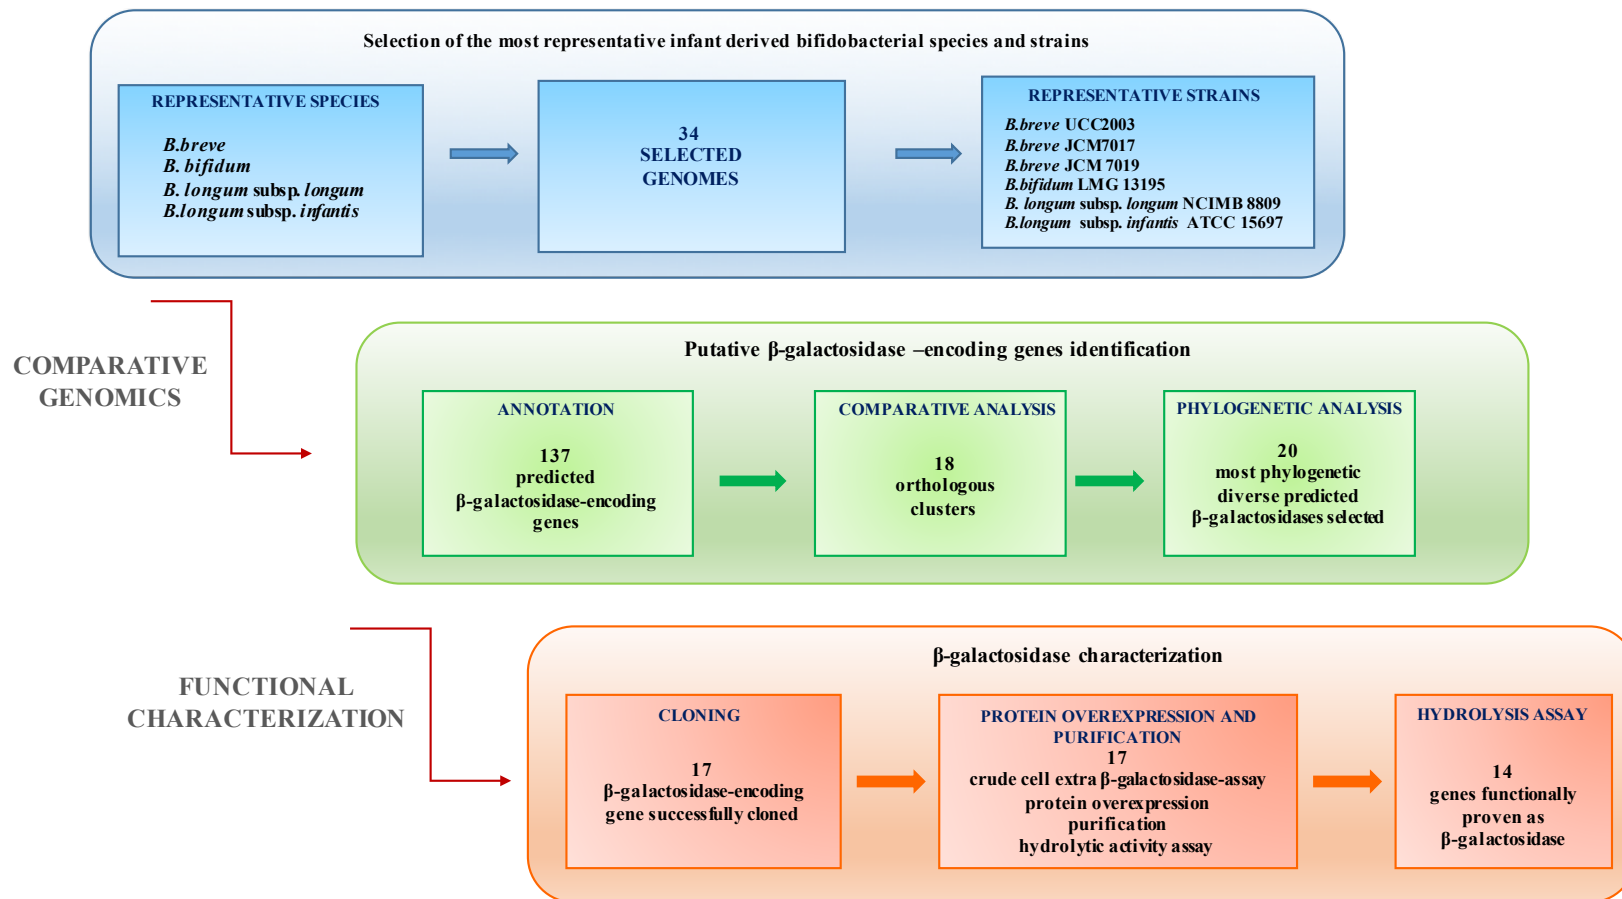

**Figure S1. *In silico* analysis and functional characterization of  $\beta$ -galactosidases.**

Schematic representation of the single steps necessary to perform genome analysis, comparative genomics and functional characterization of bifidobacterial  $\beta$ -galactosidase encoding genes.

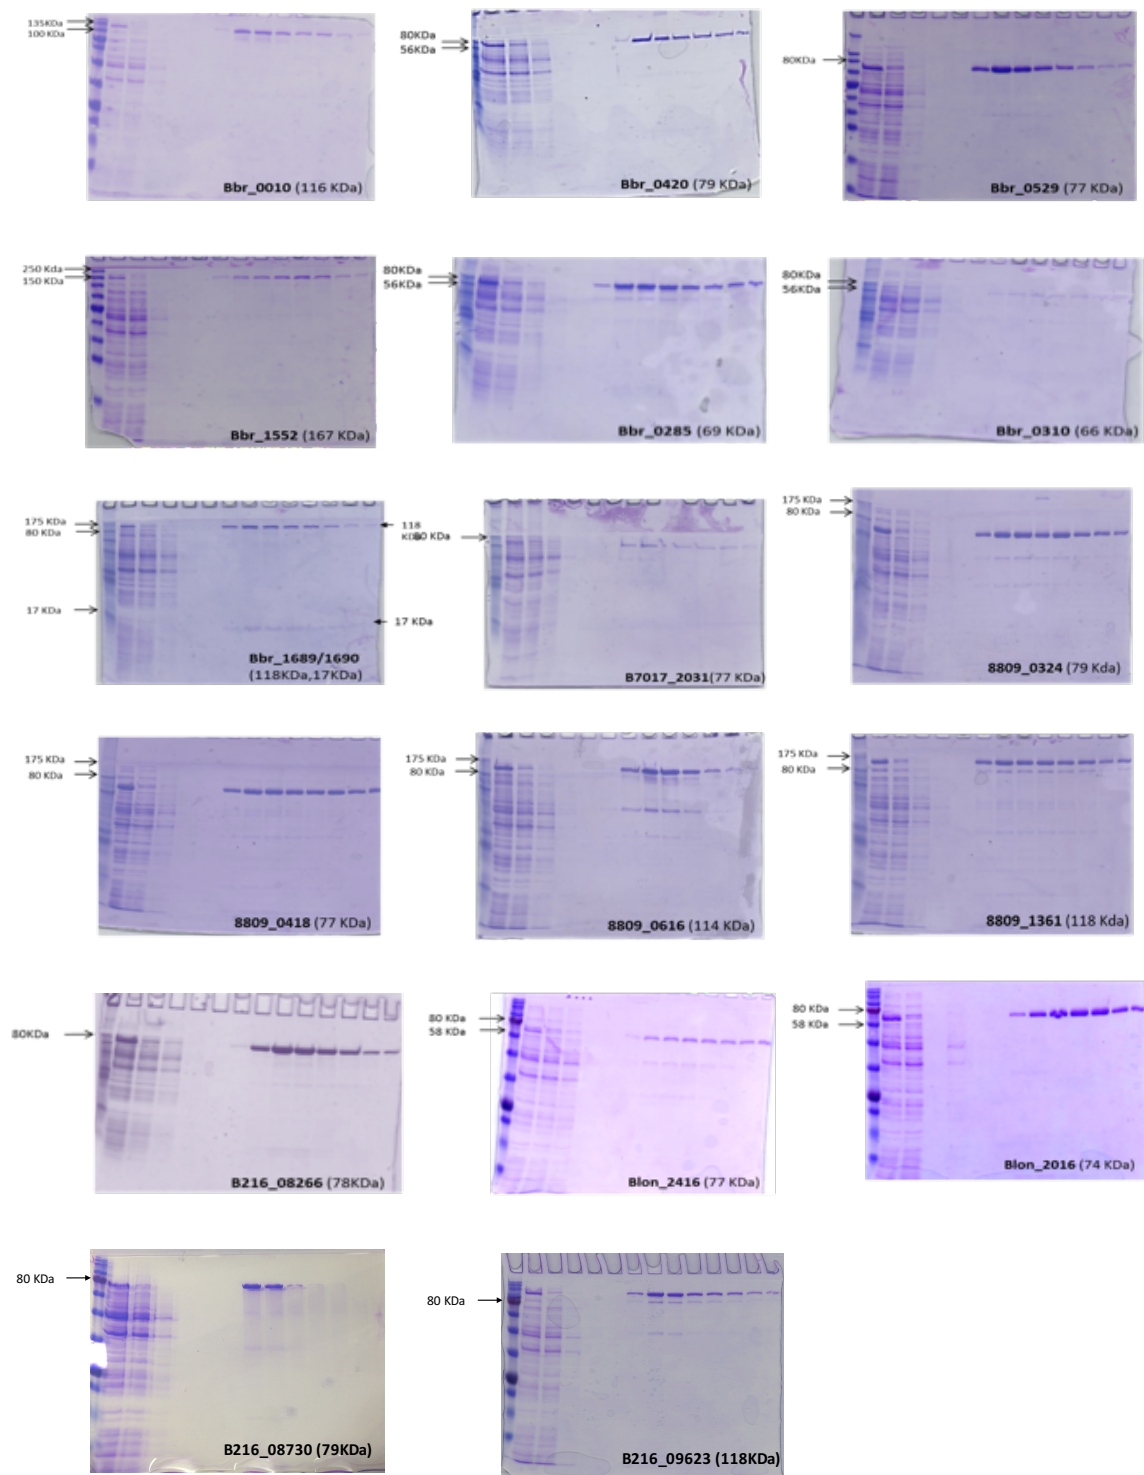

**Figure S2. SDS-PAGE of purified proteins.**

Purified bifidobacterial  $\beta$ -galactosidases visualised by SDS-polyacrylamide gel electrophoreses (SDS\_PAGE). The expected protein size is indicated beside each gene name, while black arrows highlight the range of the obtained protein size.
